# Supplementary material
Source: PubMed Central journal article supplement (PMC3743543)
Supplement: NIHMS486261-supplement-1.pdf [file NIHMS486261-supplement-1.pdf]

## Supporting Information

We estimated the rate constant of the reaction between coumarin boronate and DEPMPO-superoxide adduct (DEPMPO- $\cdot$ OOH) by monitoring the formation of a highly fluorescent product, 7-hydroxycoumarin. The DEPMPO-OOH adduct was generated in incubations containing xanthine (X, 200  $\mu$ M), xanthine oxidase (XO, generating a flux of  $O_2^{\cdot-}$  of 6  $\mu$ M/min), DEPMPO (20 mM) and DTPA (100  $\mu$ M) in a phosphate buffer (50 mM, pH 7.4). After a 10 min incubation, the formation of DEPMPO- $\cdot$ OOH spin adduct was inhibited by adding SOD (0.05 mg/ml). Following the addition of CBE to the reaction mixture, the formation of COH was measured by monitoring the fluorescence intensity (excitation at 332 nm, emission at 450 nm) and the pseudo-first order rate constant was determined. The second order rate constant of that reaction calculated from the dependence of the pseudo-first order rate constants on CBE concentrations (see Figure S1) was *ca.* 39  $M^{-1}s^{-1}$ . The quantitative data on the yield of the products of the reaction of APBA with  $ONOO^-$  in the absence and presence of radical scavengers/H-atom donors are presented in Supporting Information, Figure S2. These materials also include the optimized geometries of all stationary points, the calculated spin and charge distribution (Tables S1 and S2) as well as a complete reference (16) (G09).

## Supporting Information - Tables

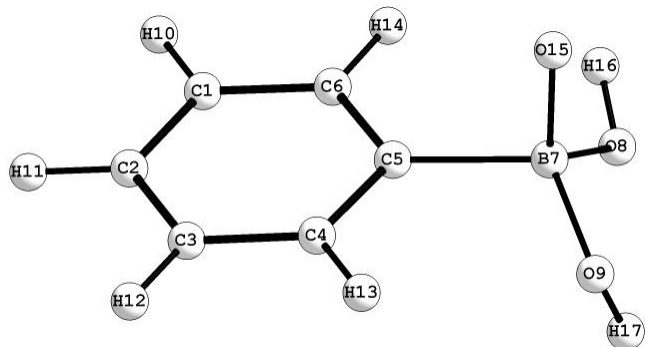

**Table S1.** PCM/M06-2X/6-31+G(d,p) computed APT atomic charges, and spin densities of PhB(OH)<sub>2</sub>O<sup>•-</sup> radical anion (RA), transition state of its fragmentation (carbon-boron bond cleavage) (TS), and the products of fragmentation process (P).

|      | RA      |                | TS      |                | P       |                |
|------|---------|----------------|---------|----------------|---------|----------------|
|      | CHARGES | SPIN DENSITIES | CHARGES | SPIN DENSITIES | CHARGES | SPIN DENSITIES |
| 1 C  | -0.041  | -0.016         | 0.012   | 0.022          | 0.002   | 0.062          |
| 2 C  | -0.102  | 0.046          | -0.150  | -0.010         | -0.107  | -0.043         |
| 3 C  | -0.037  | -0.019         | 0.014   | 0.024          | 0.007   | 0.048          |
| 4 C  | -0.081  | 0.033          | -0.191  | -0.026         | -0.092  | -0.112         |
| 5 C  | -0.272  | 0.106          | 0.440   | 0.706          | -0.013  | 1.022          |
| 6 C  | -0.068  | 0.039          | -0.193  | -0.035         | -0.095  | -0.054         |
| 7 B  | 1.414   | -0.036         | 1.528   | -0.030         | 1.887   | -0.008         |
| 8 O  | -1.056  | 0.008          | -1.035  | 0.009          | -1.091  | 0.007          |
| 9 O  | -1.034  | 0.004          | -1.018  | 0.004          | -1.074  | 0.010          |
| 10 H | 0.025   | 0.001          | 0.018   | 0.005          | 0.048   | 0.007          |
| 11 H | 0.034   | -0.002         | 0.044   | 0.001          | 0.059   | 0.002          |
| 12 H | 0.023   | 0.001          | 0.017   | 0.006          | 0.048   | 0.007          |
| 13 H | 0.045   | 0.000          | 0.075   | 0.015          | 0.095   | 0.023          |
| 14 H | 0.013   | 0.000          | 0.046   | 0.015          | 0.083   | 0.022          |
| 15 O | -0.494  | 0.834          | -1.269  | 0.295          | -1.421  | 0.007          |
| 16 H | 0.314   | -0.001         | 0.329   | -0.001         | 0.331   | 0.000          |
| 17 H | 0.317   | -0.001         | 0.333   | -0.001         | 0.333   | -0.001         |
| Ph   | -0.461  | 0.191          | 0.132   | 0.723          | 0.035   | 0.984          |
| BA   | -0.539  | 0.809          | -1.132  | 0.277          | -1.035  | 0.016          |

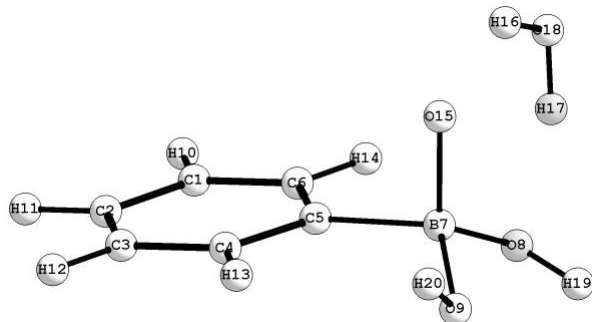

**Table S2.** PCM/M06-2X/6-31+G(d,p) computed APT atomic charges, and spin densities of  $\text{PhB(OH)}_2\text{O}^-$  radical anion water complex (RA), transition state of  $\text{PhB(OH)}_2\text{O}^-$  water-assisted fragmentation (carbon-boron bond cleavage) (TS), and the products of fragmentation process (P).

|      | RA      |                | TS      |                | P       |                |
|------|---------|----------------|---------|----------------|---------|----------------|
|      | CHARGES | SPIN DENSITIES | CHARGES | SPIN DENSITIES | CHARGES | SPIN DENSITIES |
| 1 C  | -0.046  | -0.017         | 0.016   | 0.022          | 0.012   | 0.039          |
| 2 C  | -0.089  | 0.051          | -0.136  | -0.010         | -0.105  | -0.042         |
| 3 C  | -0.050  | -0.015         | 0.000   | 0.025          | -0.010  | 0.086          |
| 4 C  | -0.051  | 0.030          | -0.176  | -0.063         | -0.087  | 0.141          |
| 5 C  | -0.274  | 0.078          | 0.405   | 0.704          | -0.040  | 0.979          |
| 6 C  | -0.069  | 0.058          | -0.210  | 0.004          | -0.129  | -0.274         |
| 7 B  | 1.379   | -0.035         | 1.561   | -0.023         | 1.884   | -0.003         |
| 8 O  | -1.089  | 0.006          | -1.052  | 0.013          | -1.081  | 0.005          |
| 9 O  | -1.036  | 0.005          | -1.041  | 0.006          | -1.069  | 0.008          |
| 10 H | 0.024   | 0.001          | 0.021   | 0.005          | 0.047   | 0.007          |
| 11 H | 0.034   | -0.002         | 0.046   | 0.001          | 0.060   | 0.003          |
| 12 H | 0.027   | 0.001          | 0.022   | 0.006          | 0.050   | 0.007          |
| 13 H | 0.025   | 0.000          | 0.079   | 0.015          | 0.084   | 0.020          |
| 14 H | 0.049   | 0.000          | 0.091   | 0.015          | 0.171   | 0.025          |
| 15 O | -0.532  | 0.840          | -1.360  | 0.284          | -1.500  | -0.002         |
| 16 H | 0.461   | -0.002         | 0.721   | -0.004         | 0.785   | 0.000          |
| 17 H | 0.514   | 0.000          | 0.365   | 0.000          | 0.341   | 0.000          |
| 18 O | -0.916  | 0.002          | -1.014  | 0.002          | -1.082  | 0.000          |
| 19 H | 0.318   | 0.001          | 0.333   | -0.001         | 0.331   | 0.000          |
| 20 H | 0.322   | 0.000          | 0.330   | -0.001         | 0.338   | 0.000          |
| Ph   | -0.421  | 0.185          | 0.156   | 0.723          | 0.052   | 0.992          |
| BA   | -0.638  | 0.815          | -1.229  | 0.279          | -1.096  | 0.008          |
| H2O  | 0.059   | 0.000          | 0.073   | -0.002         | 0.045   | 0.000          |

## Supporting Information - Figure Legends

**Figure S1. Determination of the rate constant of the reaction between DEPMPO- $\cdot$ OOH spin adduct and CBE.** Xanthine (X, 200  $\mu$ M), xanthine oxidase (XO, generating a flux of  $O_2^{\cdot-}$  of 4  $\mu$ M/min) and DEPMPO (20 mM) were pre-incubated in a phosphate buffer (50 mM, pH 7.4) containing DTPA (100  $\mu$ M). Ten minutes after the reaction, the accumulation of the DEPMPO- $\cdot$ OOH adduct was stopped by adding SOD (8  $\mu$ g/ml). After the addition of CBE, the formation of COH was followed by monitoring the fluorescence intensity (excitation at 332 nm, emission at 450 nm) and the pseudo-first order rate constant was determined.

**Figure S2. The effect of H-atom donors/radical scavengers on the yield of major/minor products of the reaction between APBA and ONOO $\cdot$ .** APBA (250  $\mu$ M) in phosphate buffer (50 mM, pH 7.4) containing DTPA (100  $\mu$ M) was reacted with ONOO $\cdot$  ( $190 \pm 10$   $\mu$ M) in the absence and presence of radical scavengers: GSH (1 mM), NADH (1 mM), AscH<sub>2</sub> (1 mM), MeCN (2.5% by vol.), MNP (20 mM, 2.5% MeCN), 2-PrOH (2.5% by vol.), tyrosine (2 mM) and ABTS (2 mM). Error bars represent standard deviation (n = 3).

Figure S1

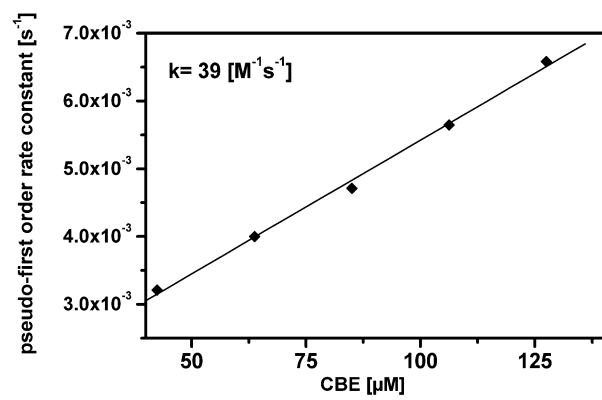

**Figure S2**

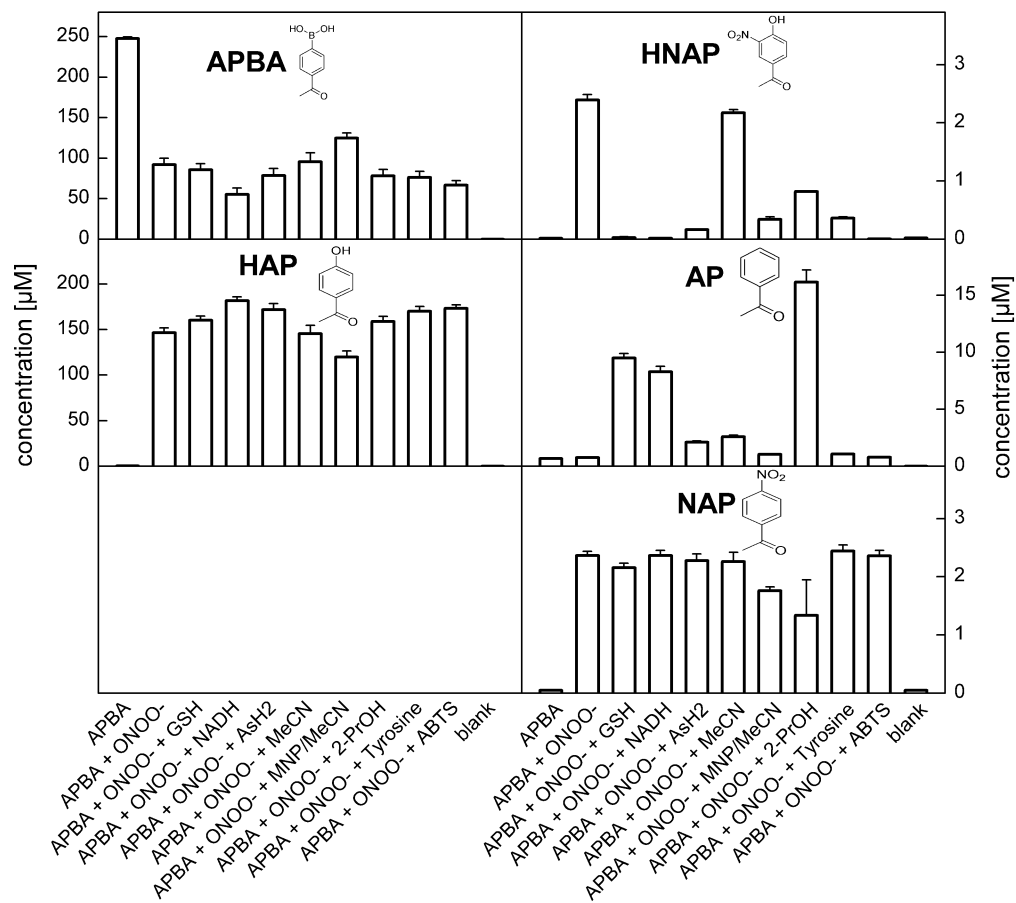

**Full reference 16:**

- (16) Frisch, M. J., Trucks, G. W., Schlegel, H. B., Scuseria, G. E., Robb, M. A., Cheeseman, J. R., Scalmani, G., Barone, V., Mennucci, B., Petersson, G. A., Nakatsuji, H., Caricato, M., Li, X., Hratchian, H. P., Izmaylov, A. F., Bloino, J., Zheng, G., Sonnenberg, J. L., Hada, M., Ehara, M., Toyota, K., Fukuda, R., Hasegawa, J., Ishida, M., Nakajima, T., Honda, Y., Kitao, O., Nakai, H., Vreven, T., Montgomery, J. A. Jr., Peralta, J. E., Ogliaro, F., Bearpark, M., Heyd, J. J., Brothers, E., Kudin, K. N., Staroverov, V. N., Kobayashi, R., Normand, J., Raghavachari, K., Rendell, A., Burant, J. C., Iyengar, S. S., Tomasi, J., Cossi, M., Rega, N., Millam, J. M., Klene, M., Knox, J. E., Cross, J. B., Bakken, V., Adamo, C., Jaramillo, J., Gomperts, R., Stratmann, R. E., Yazyev, O., Austin, A. J., Cammi, R., Pomelli, C., Ochterski, J. W., Martin, R. L., Morokuma, K., Zakrzewski, V. G., Voth, G. A., Salvador, P., Dannenberg, J. J., Dapprich, S., Daniels, A. D., Farkas, O., Foresman, J. B., Ortiz, J. V., Cioslowski, J., and Fox, D. J. (2009) *Gaussian 09, Revision A.02*, Gaussian, Inc., Wallingford CT.

## Energies and geometries of all stationary points located

and characterized in the course of this study;

Note: All structures are optimized taking into account the influence of the environment, which was modeled using the polarizable continuum solvent model (PCM) with parameters for water as implemented in Gaussian 09; energies are in hartree.

### Radical Anion

-1 2

|   |              |              |              |
|---|--------------|--------------|--------------|
| 6 | 2.166819000  | -1.196418000 | -0.067101000 |
| 6 | 2.861713000  | 0.014439000  | -0.087331000 |
| 6 | 2.150754000  | 1.215115000  | -0.038055000 |
| 6 | 0.755730000  | 1.198063000  | 0.028329000  |
| 6 | 0.034435000  | -0.004886000 | 0.031005000  |
| 6 | 0.771888000  | -1.197988000 | -0.000264000 |
| 5 | -1.644254000 | 0.010603000  | 0.058968000  |
| 8 | -2.240566000 | -1.078198000 | -0.738544000 |
| 8 | -2.195316000 | 1.276381000  | -0.438659000 |
| 1 | 2.712155000  | -2.135976000 | -0.102036000 |
| 1 | 3.946699000  | 0.021805000  | -0.138897000 |
| 1 | 2.684844000  | 2.161827000  | -0.051407000 |
| 1 | 0.205654000  | 2.135810000  | 0.060090000  |
| 1 | 0.251212000  | -2.154426000 | 0.016831000  |
| 8 | -1.757870000 | -0.133995000 | 1.481164000  |
| 1 | -2.021449000 | -1.931635000 | -0.352199000 |
| 1 | -2.455856000 | 1.166121000  | -1.358411000 |

Electronic energy= -483.405886  
Sum of electronic and zero-point Energies= -483.280659  
Sum of electronic and thermal Energies= -483.271006  
Sum of electronic and thermal Enthalpies= -483.270062  
Sum of electronic and thermal Free Energies= -483.316308

### Transition State

-1 2

|   |              |              |              |
|---|--------------|--------------|--------------|
| 6 | 2.275169000  | -1.179120000 | -0.092241000 |
| 6 | 2.930835000  | 0.053704000  | -0.136535000 |
| 6 | 2.195693000  | 1.238159000  | -0.050976000 |
| 6 | 0.802008000  | 1.194415000  | 0.078972000  |
| 6 | 0.170854000  | -0.040439000 | 0.106107000  |
| 6 | 0.882578000  | -1.230023000 | 0.041230000  |
| 5 | -1.976693000 | -0.008053000 | 0.125912000  |
| 8 | -2.335684000 | -0.995861000 | -0.854265000 |
| 8 | -2.276341000 | 1.305676000  | -0.350383000 |
| 1 | 2.847048000  | -2.101480000 | -0.154996000 |
| 1 | 4.011694000  | 0.090676000  | -0.233727000 |
| 1 | 2.706357000  | 2.197406000  | -0.084316000 |
| 1 | 0.218819000  | 2.109557000  | 0.139256000  |
| 1 | 0.373449000  | -2.190299000 | 0.088490000  |
| 8 | -1.780332000 | -0.271589000 | 1.418113000  |
| 1 | -2.184659000 | -1.871182000 | -0.483012000 |
| 1 | -2.493206000 | 1.279608000  | -1.288316000 |

Electronic energy= -483.400330  
Sum of electronic and zero-point Energies= -483.275691



Sum of electronic and thermal Energies= -483.266368  
Sum of electronic and thermal Enthalpies= -483.265424  
Sum of electronic and thermal Free Energies= -483.311314

-----  
Phenyl Radical B(OH)2O- Pair

-1 2

|   |              |              |              |
|---|--------------|--------------|--------------|
| 6 | -2.626195000 | 1.169858000  | 0.033986000  |
| 6 | -3.220151000 | -0.091903000 | 0.110872000  |
| 6 | -2.439285000 | -1.249409000 | 0.059801000  |
| 6 | -1.047219000 | -1.154885000 | -0.069358000 |
| 6 | -0.513206000 | 0.113696000  | -0.141785000 |
| 6 | -1.235251000 | 1.286853000  | -0.095532000 |
| 5 | 2.521989000  | -0.042927000 | 0.161599000  |
| 8 | 2.563724000  | 1.137902000  | -0.645187000 |
| 8 | 2.381044000  | -1.200263000 | -0.653292000 |
| 1 | -3.240799000 | 2.064604000  | 0.073840000  |
| 1 | -4.297862000 | -0.173957000 | 0.211462000  |
| 1 | -2.910025000 | -2.226485000 | 0.122130000  |
| 1 | -0.419491000 | -2.039742000 | -0.108779000 |
| 1 | -0.757568000 | 2.260295000  | -0.157165000 |
| 8 | 2.626831000  | -0.070781000 | 1.461665000  |
| 1 | 2.653368000  | 1.900724000  | -0.065009000 |
| 1 | 2.277483000  | -0.950931000 | -1.577856000 |

Electronic energy= -483.411137  
Sum of electronic and zero-point Energies= -483.285536  
Sum of electronic and thermal Energies= -483.275080  
Sum of electronic and thermal Enthalpies= -483.274136  
Sum of electronic and thermal Free Energies= -483.325197

-----  
Radical Anion and Water Complex

-1 2

|   |              |              |              |
|---|--------------|--------------|--------------|
| 6 | -2.084088000 | 1.475174000  | -0.374514000 |
| 6 | -3.089752000 | 0.575272000  | -0.015393000 |
| 6 | -2.750641000 | -0.734389000 | 0.329818000  |
| 6 | -1.413162000 | -1.134955000 | 0.312560000  |
| 6 | -0.389167000 | -0.253341000 | -0.061084000 |
| 6 | -0.750284000 | 1.062739000  | -0.386233000 |
| 5 | 1.195793000  | -0.751901000 | -0.118083000 |
| 8 | 1.921662000  | 0.034932000  | -1.138271000 |
| 8 | 1.389668000  | -2.171325000 | -0.433523000 |
| 1 | -2.340858000 | 2.497047000  | -0.641282000 |
| 1 | -4.128504000 | 0.892695000  | -0.002147000 |
| 1 | -3.527815000 | -1.439822000 | 0.612008000  |
| 1 | -1.163649000 | -2.160328000 | 0.579795000  |
| 1 | 0.028091000  | 1.769975000  | -0.664791000 |
| 8 | 1.498739000  | -0.418097000 | 1.256271000  |
| 1 | 2.240546000  | 1.476416000  | 1.209640000  |
| 1 | 2.496051000  | 1.579963000  | -0.245115000 |
| 8 | 2.613610000  | 2.105088000  | 0.570005000  |
| 1 | 2.640434000  | -0.505600000 | -1.483644000 |
| 1 | 1.249876000  | -2.698629000 | 0.359169000  |

Electronic energy= -559.824847  
Sum of electronic and zero-point Energies= -559.674128  
Sum of electronic and thermal Energies= -559.661783  
Sum of electronic and thermal Enthalpies= -559.660839  
Sum of electronic and thermal Free Energies= -559.713435

-----

Transition State and Water Complex

-1 2

|   |              |              |              |
|---|--------------|--------------|--------------|
| 6 | 2.167981000  | 1.405557000  | 0.425825000  |
| 6 | 3.140090000  | 0.458493000  | 0.093791000  |
| 6 | 2.759277000  | -0.817672000 | -0.326417000 |
| 6 | 1.402655000  | -1.154415000 | -0.415141000 |
| 6 | 0.461517000  | -0.201239000 | -0.060251000 |
| 6 | 0.809800000  | 1.080166000  | 0.337933000  |
| 5 | -1.550596000 | -0.788682000 | 0.036333000  |
| 8 | -2.031440000 | -0.066490000 | 1.182350000  |
| 8 | -1.457245000 | -2.208426000 | 0.164857000  |
| 1 | 2.466410000  | 2.399752000  | 0.748185000  |
| 1 | 4.192914000  | 0.716173000  | 0.158681000  |
| 1 | 3.516748000  | -1.553305000 | -0.584865000 |
| 1 | 1.092254000  | -2.146202000 | -0.732214000 |
| 1 | 0.041136000  | 1.809277000  | 0.580743000  |
| 8 | -1.638429000 | -0.224161000 | -1.177651000 |
| 1 | -2.073522000 | 1.319815000  | -0.896111000 |
| 1 | -2.469675000 | 2.058716000  | 0.371846000  |
| 8 | -2.380783000 | 2.221454000  | -0.575849000 |
| 1 | -1.954422000 | -0.544424000 | 2.013431000  |
| 1 | -1.443609000 | -2.520731000 | 1.074556000  |

Electronic energy= -559.818028  
 Sum of electronic and zero-point Energies= -559.669328  
 Sum of electronic and thermal Energies= -559.657105  
 Sum of electronic and thermal Enthalpies= -559.656161  
 Sum of electronic and thermal Free Energies= -559.708961

-----  
 Phenyl Radical, B(OH)2O- and Water Complex

-1 2

|   |              |              |              |
|---|--------------|--------------|--------------|
| 6 | 2.058496000  | 1.407442000  | -0.177933000 |
| 6 | 3.294644000  | 0.756263000  | -0.167254000 |
| 6 | 3.366831000  | -0.627256000 | 0.007233000  |
| 6 | 2.194361000  | -1.378418000 | 0.173160000  |
| 6 | 1.004728000  | -0.683045000 | 0.156203000  |
| 6 | 0.872749000  | 0.678928000  | -0.012930000 |
| 5 | -2.184361000 | -0.717745000 | -0.162849000 |
| 8 | -2.024736000 | -0.361164000 | 1.202965000  |
| 8 | -2.056114000 | -2.084599000 | -0.502515000 |
| 1 | 2.012708000  | 2.484346000  | -0.314294000 |
| 1 | 4.207419000  | 1.329801000  | -0.295037000 |
| 1 | 4.331392000  | -1.126928000 | 0.014497000  |
| 1 | 2.234732000  | -2.455092000 | 0.308168000  |
| 1 | -0.101278000 | 1.162959000  | -0.017763000 |
| 8 | -2.460008000 | 0.198362000  | -1.063038000 |
| 1 | -2.364026000 | 1.552082000  | -0.363296000 |
| 1 | -2.107266000 | 2.085891000  | 1.069467000  |
| 8 | -2.266502000 | 2.418922000  | 0.178202000  |
| 1 | -1.846711000 | -2.666952000 | 0.234044000  |
| 1 | -1.737144000 | -1.073033000 | 1.782670000  |

Electronic energy= -559.830786  
 Sum of electronic and zero-point Energies= -559.680755  
 Sum of electronic and thermal Energies= -559.667835  
 Sum of electronic and thermal Enthalpies= -559.666891  
 Sum of electronic and thermal Free Energies= -559.723360

-----
